# Supplementary material for: Insights into the Procoagulant Profile of Patients with Systemic Lupus Erythematosus without Antiphospholipid Antibodies
Source: MDPI journal article supplement (doi:10.3390/jcm9103297), 2020-10-14
Supplement: s1 [file s1]

## SUPPLEMENTARY MATERIAL

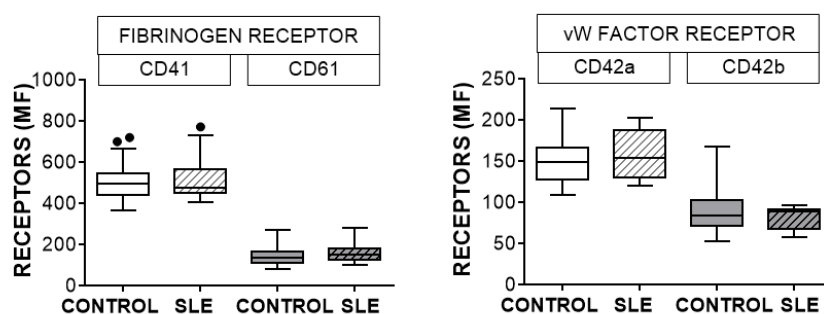

**Figure S1. Fibrinogen and von Willebrand factor (vW Factor) receptors expression on quiescent platelets.** Platelets were incubated with PE-anti CD41 and FITC-anti CD61 mAbs to detect fibrinogen receptor and with FITC-anti CD42a and FITC-anti CD42b mAbs to test vW Factor receptors. Data are expressed as mean fluorescence (MF). Samples were analysed by flow cytometry.

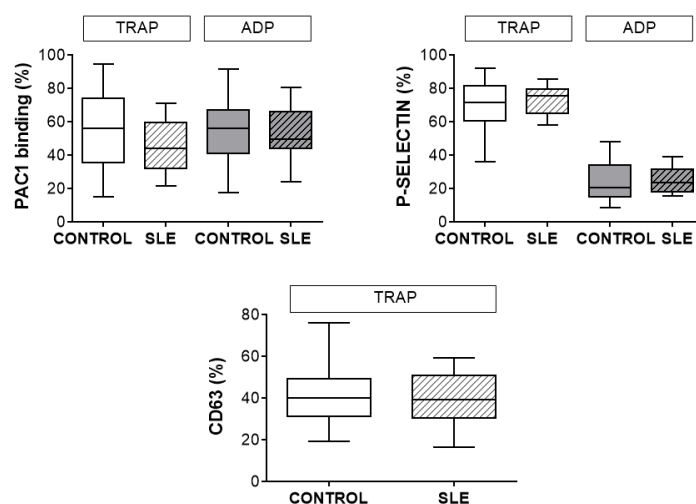

**Figure S2. Platelet's activation markers.** Platelets were stimulated with either 100  $\mu$ M TRAP or 20  $\mu$ M ADP and FITC-PAC1, FITC-anti P-selectin mAb and FITC-anti CD63 mAb were added. Data are expressed as % of positive cells. Samples were analysed by flow cytometry.

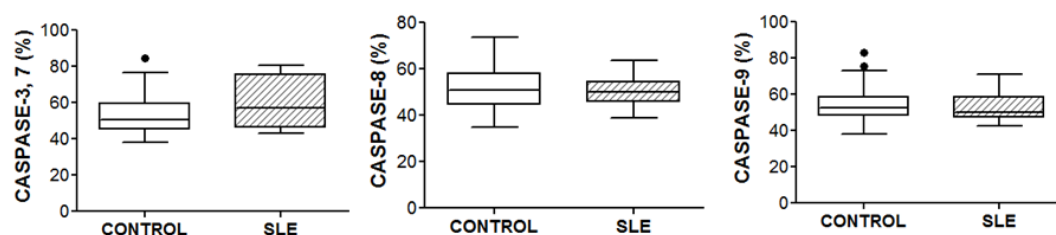

**Figure S3. Caspase activities in quiescent platelets.** Data are expressed as % of positive cells. Samples were analysed by flow cytometry.
